# Supplementary material for: Preliminary Validation and Reliability Testing of the Montreal Instrument for Cat Arthritis Testing, for Use by Veterinarians, in a Colony of Laboratory Cats
Source: MDPI journal article supplement (doi:10.3390/ani5040410), 2015-12-02
Supplement: s1 [file s1]

## Preliminary Validation and Reliability Testing of the Montreal Instrument for Cat Arthritis Testing, for Use by Veterinarians, in a Colony of Laboratory Cats

MI-CAT(V) – Montreal Instrument for Cat Arthritis Testing (Veterinary)

| #                                                                                                                                                                                                                                                                                                          | Category                            | Assessment Criteria                                                                                                                                             | Grade |
|------------------------------------------------------------------------------------------------------------------------------------------------------------------------------------------------------------------------------------------------------------------------------------------------------------|-------------------------------------|-----------------------------------------------------------------------------------------------------------------------------------------------------------------|-------|
| Assign a value for each of categories 1-4 prior to hands-on examination. The cat should be allowed to walk on exam room floor, be placed on a low bench or chair to observe willingness/ability to jump down, and encouraged to jump up by placing the empty carrier on a bench/chair in front of the cat. |                                     |                                                                                                                                                                 |       |
| 1                                                                                                                                                                                                                                                                                                          | Exploratory Behavior                | Walks, runs or jumps freely                                                                                                                                     | 0     |
|                                                                                                                                                                                                                                                                                                            |                                     | Walks slowly/cautiously, or with abnormal or lowered body posture                                                                                               | 1     |
|                                                                                                                                                                                                                                                                                                            |                                     | No ambulation/exploratory behavior                                                                                                                              | 2     |
| 2                                                                                                                                                                                                                                                                                                          | a. Body Posture – head, torso, tail | Ambulates/stands/sits/lies with even weight distribution from front to rear, back level, head up, tail above horizontal                                         | 0     |
|                                                                                                                                                                                                                                                                                                            |                                     | Head low/tail lowered (not tucked)                                                                                                                              | 1     |
|                                                                                                                                                                                                                                                                                                            |                                     | Overt abnormalities: weight shifted forward or backward, hunched back, limp tail<br>- 1 finding                                                                 | 2     |
|                                                                                                                                                                                                                                                                                                            |                                     | - ≥2 findings                                                                                                                                                   | 3     |
|                                                                                                                                                                                                                                                                                                            | b. Body Posture – front limbs       | Ambulates/stands/sits/lies with limbs in normal state of flexion/extension, even weight distribution from right to left                                         | 0     |
|                                                                                                                                                                                                                                                                                                            |                                     | Overt abnormalities: limb hyperflexion, limb hyperextension, unequal weight distribution from right to left, or other asymmetry<br>- 1 finding                  | 1     |
|                                                                                                                                                                                                                                                                                                            |                                     | - ≥2 findings                                                                                                                                                   | 2     |
|                                                                                                                                                                                                                                                                                                            | c. Body Posture – rear limbs        | Ambulates/stands/sits/lies with limbs in normal state of flexion/extension, even weight distribution from right to left                                         | 0     |
|                                                                                                                                                                                                                                                                                                            |                                     | Overt abnormalities: plantigrade stance, limb hyperflexion or hyperextension, unequal weight distribution from right to left, or other asymmetry<br>- 1 finding | 1     |
|                                                                                                                                                                                                                                                                                                            |                                     | - ≥2 findings                                                                                                                                                   | 2     |
| 3                                                                                                                                                                                                                                                                                                          | Gait/Locomotion                     | Normal gait, jumps up/down willingly and smoothly                                                                                                               | 0     |
|                                                                                                                                                                                                                                                                                                            |                                     | Normal gait, reluctant or unwilling to jump                                                                                                                     | 1     |
|                                                                                                                                                                                                                                                                                                            |                                     | Generally normal gait, occasionally awkward (e.g., misses a jump or missteps)                                                                                   | 2     |
|                                                                                                                                                                                                                                                                                                            |                                     | Mildly to moderately abnormal gait (e.g., stiff or weak, or with abnormal limb placement or carriage)                                                           | 3     |
|                                                                                                                                                                                                                                                                                                            |                                     | Obviously limping on 1 or more limbs                                                                                                                            | 4     |

Figure S1. Cont.

|   |                                                                                                                  |                                                       |   |
|---|------------------------------------------------------------------------------------------------------------------|-------------------------------------------------------|---|
| 4 | Interaction with Examiner                                                                                        | Friendly: approaches/rubs/wants to be petted          | 0 |
|   |                                                                                                                  | Immobile: neither avoids nor solicits contact         | 1 |
|   |                                                                                                                  | Withdraws/avoids touch                                | 2 |
|   |                                                                                                                  | Hisses/growls/swats/bites or threatens                | 3 |
| 5 | Body Condition Score                                                                                             | Normal: 3/5                                           | 0 |
|   |                                                                                                                  | Thin: 1/2-2/5                                         | 1 |
|   |                                                                                                                  | Overweight: 4/5                                       | 1 |
|   |                                                                                                                  | Obese: 5/5                                            | 2 |
| 6 | a. Coat Condition                                                                                                | Clean, shiny, no mats                                 | 0 |
|   |                                                                                                                  | Unkempt, flaky, not shiny; no overt dirt/mats         | 1 |
|   |                                                                                                                  | Dirty/matted (localized)                              | 2 |
|   |                                                                                                                  | Dirty/matted (generalized)                            | 3 |
|   | b. Claw Condition<br>Note overgrown claws (not abnormal claws in polydactyls).<br>Note "0" if all feet declawed. | Claws sharp (unless trimmed), normal length/thickness | 0 |
|   |                                                                                                                  | Occasional overgrown (thick or excessively long) claw | 1 |
|   |                                                                                                                  | Most claws on one or more paws overgrown              | 2 |

For categories 7 and 8, perform palpation and manipulation (including full flexion/extension, as well as assessment of side-to-side and cranial-caudal motion) of the neck, back, tail, and each appendicular joint, with the patient standing first, then in lateral recumbency. Do not repeat manipulation if patient attempts to bite.

| 7   Palpation and Manipulation – <b>Findings</b> (check ALL that apply) |                |                  |          |                         |                                 |
|-------------------------------------------------------------------------|----------------|------------------|----------|-------------------------|---------------------------------|
| Joint                                                                   | Muscle atrophy | Joint thickening | Crepitus | Reduced range of motion | Total for each joint (out of 4) |
| Cervical spine                                                          |                |                  |          |                         | /4                              |
| Thoracolumbar spine                                                     |                |                  |          |                         | /4                              |
| Sacrococcygeal spine                                                    |                |                  |          |                         | /4                              |
| Manus                                                                   |                |                  |          |                         | /4                              |
| Carpus                                                                  |                |                  |          |                         | /4                              |
| Elbow                                                                   |                |                  |          |                         | /4                              |
| Shoulder                                                                |                |                  |          |                         | /4                              |
| Pes                                                                     |                |                  |          |                         | /4                              |
| Tarsus                                                                  |                |                  |          |                         | /4                              |
| Stifle                                                                  |                |                  |          |                         | /4                              |
| Hip                                                                     |                |                  |          |                         | /4                              |

| 8   Palpation and Manipulation – <b>Cat Response</b> (check ALL that apply) |                    |                          |                              |                        |                                         |
|-----------------------------------------------------------------------------|--------------------|--------------------------|------------------------------|------------------------|-----------------------------------------|
| Joint                                                                       | Flinches/withdraws | Vocalizes /hisses/growls | Threatens to bite or scratch | Response is repeatable | Non-evaluable response (ex: aggression) |
| Cervical spine                                                              |                    |                          |                              |                        |                                         |
| Thoracolumbar spine                                                         |                    |                          |                              |                        |                                         |
| Sacrococcygeal spine                                                        |                    |                          |                              |                        |                                         |
| Manus                                                                       |                    |                          |                              |                        |                                         |
| Carpus                                                                      |                    |                          |                              |                        |                                         |
| Elbow                                                                       |                    |                          |                              |                        |                                         |
| Shoulder                                                                    |                    |                          |                              |                        |                                         |
| Pes                                                                         |                    |                          |                              |                        |                                         |
| Tarsus                                                                      |                    |                          |                              |                        |                                         |
| Stifle                                                                      |                    |                          |                              |                        |                                         |
| Hip                                                                         |                    |                          |                              |                        |                                         |

Figure S1. MI-CAT(V)-v1.

**MI-CAT(Veterinary)**

| #                                                                                                                                                                                                                                                                                                          | Assessment Criteria                                                                                    | Grade                                                                                                                                            |   |
|------------------------------------------------------------------------------------------------------------------------------------------------------------------------------------------------------------------------------------------------------------------------------------------------------------|--------------------------------------------------------------------------------------------------------|--------------------------------------------------------------------------------------------------------------------------------------------------|---|
| Assign a value for each of categories 1-4 prior to hands-on examination. The cat should be allowed to walk on exam room floor, be placed on a low bench or chair to observe willingness/ability to jump down, and encouraged to jump up by placing the empty carrier on a bench/chair in front of the cat. |                                                                                                        |                                                                                                                                                  |   |
| 1                                                                                                                                                                                                                                                                                                          | <i>Exploratory behavior</i>                                                                            |                                                                                                                                                  |   |
|                                                                                                                                                                                                                                                                                                            | Walks and/or runs; jumps freely                                                                        | 0                                                                                                                                                |   |
|                                                                                                                                                                                                                                                                                                            | Walks and runs; jumps with mild encouragement                                                          | 1                                                                                                                                                |   |
|                                                                                                                                                                                                                                                                                                            | Walks but does not run; jumps with mild encouragement                                                  | 2                                                                                                                                                |   |
|                                                                                                                                                                                                                                                                                                            | Walks and runs; reluctant or unwilling to jump                                                         | 3                                                                                                                                                |   |
|                                                                                                                                                                                                                                                                                                            | Walks normally; does not run; reluctant or unwilling to jump                                           | 4                                                                                                                                                |   |
|                                                                                                                                                                                                                                                                                                            | Walks slowly/cautiously, or with abnormal or lowered body posture                                      | 5                                                                                                                                                |   |
|                                                                                                                                                                                                                                                                                                            | Recumbent/sitting (no ambulation)                                                                      | 6                                                                                                                                                |   |
| 2                                                                                                                                                                                                                                                                                                          | <i>Gait</i>                                                                                            |                                                                                                                                                  |   |
|                                                                                                                                                                                                                                                                                                            | Normal gait                                                                                            | 0                                                                                                                                                |   |
|                                                                                                                                                                                                                                                                                                            | Not assessable – limited or no ambulation                                                              | 1                                                                                                                                                |   |
|                                                                                                                                                                                                                                                                                                            | Occasionally awkward (e.g., misses a jump or missteps)                                                 | 2                                                                                                                                                |   |
|                                                                                                                                                                                                                                                                                                            | Mild abnormality (e.g. inconsistent/mild stiffness/weakness or abnormal limb placement/carriage)       | 3                                                                                                                                                |   |
|                                                                                                                                                                                                                                                                                                            | Moderate abnormality (e.g. consistent/moderate stiffness/weakness or abnormal limb placement/carriage) | 4                                                                                                                                                |   |
|                                                                                                                                                                                                                                                                                                            | Obviously limping on 1 or more limbs                                                                   | 5                                                                                                                                                |   |
| 3                                                                                                                                                                                                                                                                                                          | <i>Body Posture</i>                                                                                    |                                                                                                                                                  |   |
|                                                                                                                                                                                                                                                                                                            | a. head, torso, tail                                                                                   | Ambulates/stands/sits/lies with even weight distribution from front to rear, back level, head up, tail above horizontal                          | 0 |
|                                                                                                                                                                                                                                                                                                            |                                                                                                        | Head low/tail lowered (not tucked)                                                                                                               | 1 |
|                                                                                                                                                                                                                                                                                                            |                                                                                                        | Overt abnormalities: weight shifted forward or backward, hunched back, limp tail                                                                 | 2 |
|                                                                                                                                                                                                                                                                                                            |                                                                                                        | 1 finding                                                                                                                                        | 3 |
|                                                                                                                                                                                                                                                                                                            |                                                                                                        | ≥2 findings                                                                                                                                      | 3 |
|                                                                                                                                                                                                                                                                                                            | b. front limbs                                                                                         | Ambulates/stands/sits/lies with limbs in normal state of flexion/extension, even weight distribution from right to left                          | 0 |
|                                                                                                                                                                                                                                                                                                            |                                                                                                        | Overt abnormalities: limb hyperflexion, limb hyperextension, unequal weight distribution from right to left, or other asymmetry                  | 1 |
|                                                                                                                                                                                                                                                                                                            |                                                                                                        | 1 finding                                                                                                                                        | 2 |
|                                                                                                                                                                                                                                                                                                            |                                                                                                        | ≥2 findings                                                                                                                                      | 2 |
|                                                                                                                                                                                                                                                                                                            | c. rear limbs                                                                                          | Ambulates/stands/sits/lies with limbs in normal state of flexion/extension, even weight distribution from right to left                          | 0 |
|                                                                                                                                                                                                                                                                                                            |                                                                                                        | Overt abnormalities: plantigrade stance, limb hyperflexion or hyperextension, unequal weight distribution from right to left, or other asymmetry | 1 |
| 1 finding                                                                                                                                                                                                                                                                                                  |                                                                                                        | 2                                                                                                                                                |   |
|                                                                                                                                                                                                                                                                                                            | ≥2 findings                                                                                            | 2                                                                                                                                                |   |

**Figure S2. Cont.**

|                                                                                                                                                                                                                                                                                                                                                                                                      |                                                   |                                                   |    |
|------------------------------------------------------------------------------------------------------------------------------------------------------------------------------------------------------------------------------------------------------------------------------------------------------------------------------------------------------------------------------------------------------|---------------------------------------------------|---------------------------------------------------|----|
| 4                                                                                                                                                                                                                                                                                                                                                                                                    | <i>Interactions with examiner</i>                 |                                                   |    |
|                                                                                                                                                                                                                                                                                                                                                                                                      | Friendly: approaches/rubs/wants to be petted      | 0                                                 |    |
|                                                                                                                                                                                                                                                                                                                                                                                                      | Neither avoids nor solicits contact               | 1                                                 |    |
|                                                                                                                                                                                                                                                                                                                                                                                                      | Withdraws/avoids touch                            | 2                                                 |    |
|                                                                                                                                                                                                                                                                                                                                                                                                      | Hisses/growls/swats/bites or threatens            | 3                                                 |    |
| Perform palpation and manipulation in whatever position is best tolerated by the patient. Assess whether response is present and repeatable, and association with pain. A response may consist of: tensing, flinching, withdrawing or attempting to escape, vocalization (hiss, growl, meow, etc.), turning toward the handled body part or threatening to bite or scratch, or biting or scratching. |                                                   |                                                   |    |
| 5                                                                                                                                                                                                                                                                                                                                                                                                    | <i>Cat response to palpation and manipulation</i> |                                                   |    |
|                                                                                                                                                                                                                                                                                                                                                                                                      | a. cervical spine                                 | No repeatable response                            | 0  |
|                                                                                                                                                                                                                                                                                                                                                                                                      |                                                   | Repeatable response, but not clear if due to pain | 1  |
|                                                                                                                                                                                                                                                                                                                                                                                                      |                                                   | Repeatable painful response                       | 2  |
|                                                                                                                                                                                                                                                                                                                                                                                                      | b. thoracic spine                                 | No repeatable response                            | 0  |
|                                                                                                                                                                                                                                                                                                                                                                                                      |                                                   | Repeatable response, but not clear if due to pain | 1  |
|                                                                                                                                                                                                                                                                                                                                                                                                      |                                                   | Repeatable painful response                       | 2  |
|                                                                                                                                                                                                                                                                                                                                                                                                      | c. lumbar (and lumbosacral) spine                 | No repeatable response                            | 0  |
|                                                                                                                                                                                                                                                                                                                                                                                                      |                                                   | Repeatable response, but not clear if due to pain | 1  |
|                                                                                                                                                                                                                                                                                                                                                                                                      |                                                   | Repeatable painful response                       | 2  |
|                                                                                                                                                                                                                                                                                                                                                                                                      | <b>Total score: axial skeleton</b>                |                                                   | /6 |
|                                                                                                                                                                                                                                                                                                                                                                                                      | d. carpus                                         | No repeatable response                            | 0  |
|                                                                                                                                                                                                                                                                                                                                                                                                      |                                                   | Repeatable response, but not clear if due to pain | 1  |
|                                                                                                                                                                                                                                                                                                                                                                                                      |                                                   | Repeatable painful response                       | 2  |
|                                                                                                                                                                                                                                                                                                                                                                                                      | e. elbow                                          | No repeatable response                            | 0  |
|                                                                                                                                                                                                                                                                                                                                                                                                      |                                                   | Repeatable response, but not clear if due to pain | 1  |
|                                                                                                                                                                                                                                                                                                                                                                                                      |                                                   | Repeatable painful response                       | 2  |
|                                                                                                                                                                                                                                                                                                                                                                                                      | f. shoulder                                       | No repeatable response                            | 0  |
|                                                                                                                                                                                                                                                                                                                                                                                                      |                                                   | Repeatable response, but not clear if due to pain | 1  |
|                                                                                                                                                                                                                                                                                                                                                                                                      |                                                   | Repeatable painful response                       | 2  |
|                                                                                                                                                                                                                                                                                                                                                                                                      | <b>Total score: front limb</b>                    |                                                   | /6 |
|                                                                                                                                                                                                                                                                                                                                                                                                      | g. tarsus                                         | No repeatable response                            | 0  |
|                                                                                                                                                                                                                                                                                                                                                                                                      |                                                   | Repeatable response, but not clear if due to pain | 1  |
|                                                                                                                                                                                                                                                                                                                                                                                                      |                                                   | Repeatable painful response                       | 2  |
|                                                                                                                                                                                                                                                                                                                                                                                                      | h. stifle                                         | No repeatable response                            | 0  |
| Repeatable response, but not clear if due to pain                                                                                                                                                                                                                                                                                                                                                    |                                                   | 1                                                 |    |
| Repeatable painful response                                                                                                                                                                                                                                                                                                                                                                          |                                                   | 2                                                 |    |
| i. hip                                                                                                                                                                                                                                                                                                                                                                                               | No repeatable response                            | 0                                                 |    |
|                                                                                                                                                                                                                                                                                                                                                                                                      | Repeatable response, but not clear if due to pain | 1                                                 |    |
|                                                                                                                                                                                                                                                                                                                                                                                                      | Repeatable painful response                       | 2                                                 |    |
| <b>Total score: rear limb</b>                                                                                                                                                                                                                                                                                                                                                                        |                                                   | /6                                                |    |
| Add scores for 1, 2, 3a-c, 4, 5 Total axial skeleton, Total front limb, Total rear limb                                                                                                                                                                                                                                                                                                              |                                                   |                                                   |    |
| <b>Total MI-CAT(V) score</b>                                                                                                                                                                                                                                                                                                                                                                         |                                                   | <b>/ 39</b>                                       |    |

Figure S2. MI-CAT(V)-v2.
